# Supplementary material for: Macrophage-Biomimetic Nanoparticles Ameliorate Ulcerative Colitis through Reducing Inflammatory Factors Expression
Source: PubMed Central journal article supplement — J Innate Immun. 2021 Nov 1;14(4):380–92. doi: 10.1159/000519363 (PMC9274947; doi:10.1159/000519363), 2021-11-01
Supplement: jin-0014-0380-s01.pdf [file jin-0014-0380-s01.pdf]

## Macrophage-biomimetic nanoparticles ameliorate ulcerative colitis through reducing inflammatory factors expression

### Supplementary Information

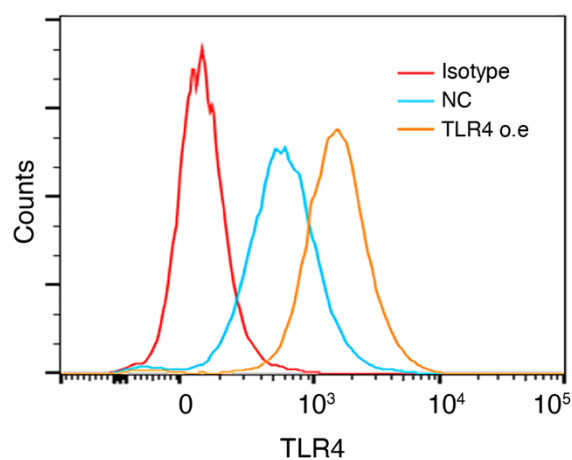

**Figure S1. TLR4 overexpressed in RAW264.7 cells.** TLR4 overexpression vector was transfected in RAW264.7 cells for 48 h, and the expression of TLR4 molecules on the cell surface was determined by flow cytometry. Isotype, antibody isotype control. NC, untransfected group.

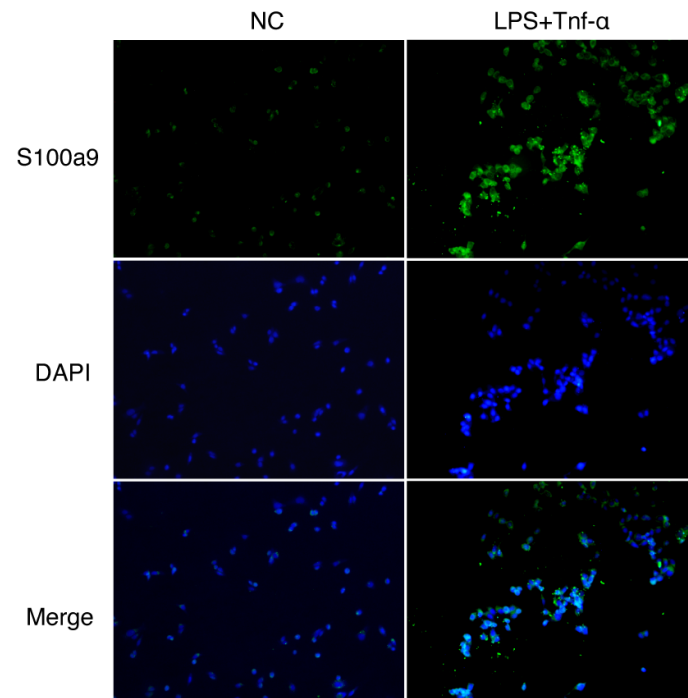

**Figure S2. Inflammation induced S100a9 expression.** Immunofluorescence detection of S100a9 protein expression after treatment with LPS and Tnf- $\alpha$  in RA264.7 cells. NC, untreated group.

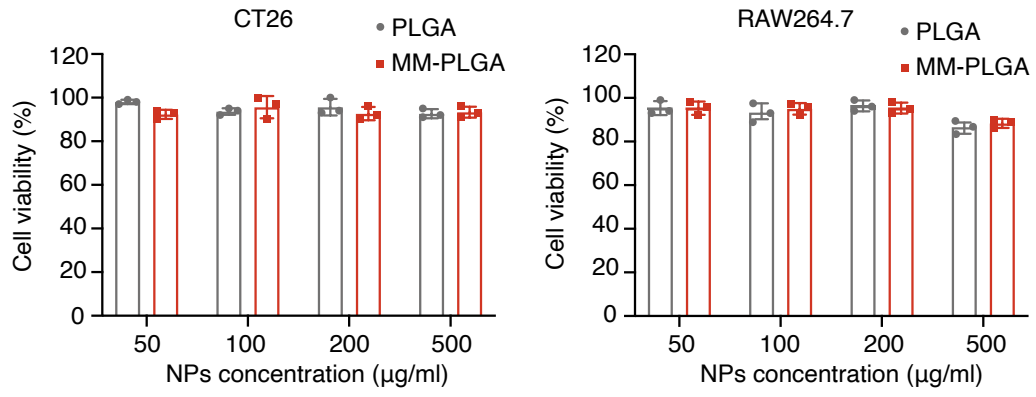

**Figure S3. In vitro cytotoxicity of PLGA or MM-PLGA.** CT26 cells (left) or RAW264.7 cells (right) were co-incubated with PLGA or MM-PLGA nanoparticles for 24 h and assessed for cell viability by MTT assay.

**Table S1. Primers for qRT-PCR**

| Gene                     | Forward primer [5'-3']   | Reverse primer [5'-3'] |
|--------------------------|--------------------------|------------------------|
| <i>S100A9</i> -<br>mouse | ACCACCATCATCGACACCTTC    | AAAGGTTGCCAACTGTGCTTC  |
| <i>Il1β</i> -<br>mouse   | AGCCTCGTGCTGTCGGACCC     | TCCAGCTGCAGGGTGGGTGT   |
| <i>Il6</i> -<br>mouse    | CCTCTCTGCAAGAGACTTCCATCC | AGCCTCCGACTTGTGAAGTGG  |
| <i>Il10</i> -<br>mouse   | CAGTACAGCCGGGAAGACAA     | CCTGGGGCATCACTTCTACC   |
| <i>Il17</i> -<br>mouse   | AACATGAGTCCAGGGAGAGC     | CTGCCTGGCGGACAATCGAG   |
| <i>iNos</i> -<br>mouse   | ACCACCATCATCGACACCTTC    | CCAGAGGCAGCACATCAAAGC  |
| <i>Tnfa</i> -<br>mouse   | AGGGGCCACCACGCTCTTCT     | CATGCCGTTGGCCAGGAGGG   |
| <i>Gapdh</i> -<br>mouse  | TCTGACGTGCCGCTGGAGA      | CAGCCCCGGCATCGAAGGTG   |

**Table S2. Characterization of PLGA nanoparticles and membrane coated nanoparticle.**

| Nanoparticles   | Mean size<br>[nm] | PDI         | Zeta<br>[mV] | DL<br>[%]  | EE <sub>TAS</sub><br>[%] |
|-----------------|-------------------|-------------|--------------|------------|--------------------------|
| PLGA-TAS        | 168.1± 0.5        | 0.048± 0.02 | -20.3± 0.5   | 6.37± 0.26 | 67.42± 1.79              |
| PLGA-TAS/DIR    | 173.6± 1.2        | 0.033± 0.06 | -19.8± 0.7   | 5.52± 0.53 | 62.04± 2.84              |
| MM-PLGA-TAS     | 207.2± 3.7        | 0.036± 0.03 | -18.4± 1.1   | 6.02± 0.58 | 64.87± 3.50              |
| MM-PLGA-TAS/DIR | 203.6± 5.8        | 0.059± 0.05 | -19.3± 0.5   | 5.19± 0.74 | 58.14± 2.53              |

DL: drug loading, EE: encapsulation efficiencies
